# Supplementary material
Source: PubMed Central journal article supplement (PMC5726374)
Supplement: EHP631.s001.acco.pdf [file EHP631.s001.acco.pdf]

**Note to readers with disabilities:** *EHP* strives to ensure that all journal content is accessible to all readers. However, some figures and Supplemental Material published in *EHP* articles may not conform to [508 standards](#) due to the complexity of the information being presented. If you need assistance accessing journal content, please contact [ehp508@niehs.nih.gov](mailto:ehp508@niehs.nih.gov). Our staff will work with you to assess and meet your accessibility needs within 3 working days.

## **Supplemental Material**

### **Manganese in Drinking Water and Cognitive Abilities and Behavior at 10 Years of Age: A Prospective Cohort Study**

Syed Moshfiqur Rahman, Maria Kippler, Fahmida Tofail, Sven Bölte, Jena Derakhshani Hamadani, and Marie Vahter

#### **Table of Contents**

**Table S1.** Limits of detection (LOD) for the ICP-MS measurements of manganese and arsenic in drinking water and the obtained results for the certified reference samples for trace elements in water (NIST 1643e, Trace Elements in Water, National Institute of Standards and Technology, Gaithersburg, MD).

**Figure S1.** Association between children's drinking water manganese (Mn) and arsenic concentrations at 10 years of age. The cutoff value for water arsenic concentrations at 20 µg/L is marked with dotted line.

**Table S1.** Limits of detection (LOD) for the ICP-MS measurements of manganese and arsenic in drinking water and the obtained results for the certified reference samples for trace elements in water (NIST 1643e, Trace Elements in Water, National Institute of Standards and Technology, Gaithersburg, MD).

| <b>Element</b>                  | <b>Recommended value<br/>(mean ± SD)</b> | <b>Obtained value<br/>(mean ± SD)</b> | <b>LOD</b> |
|---------------------------------|------------------------------------------|---------------------------------------|------------|
| <b>Water at 10 years (n=73)</b> |                                          |                                       |            |
| Manganese                       | 38.02 ± 0.44                             | 34.7 ± 1.5                            | 0.028      |
| Arsenic                         | 58.98 ± 0.70                             | 58.5 ± 1.0                            | 0.01       |
| <b>Water at 5 years (n=63)</b>  |                                          |                                       |            |
| Manganese                       | 38.02 ± 0.44                             | 38 ± 0.88                             | 0.018      |
| Arsenic                         | 58.98 ± 0.70                             | 59 ± 1.7                              | 0.01       |
| <b>Water prenatally (n=22)</b>  |                                          |                                       |            |
| Manganese                       | 38.02 ± 0.44                             | 39 ± 0.56                             | 0.020      |
| Arsenic                         | 58.98 ± 0.70                             | 61 ± 1.8                              | 0.01       |

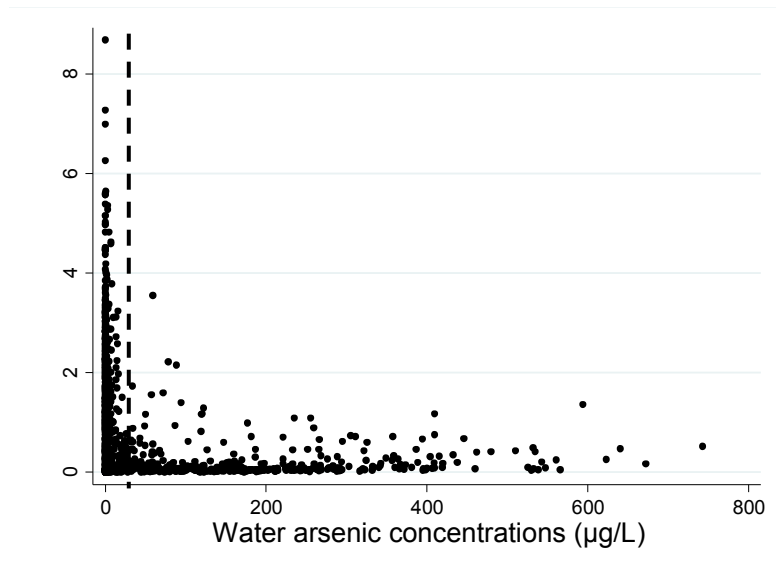

**Figure S1.** Association between children's drinking water manganese (Mn) and arsenic concentrations at 10 years of age. The cutoff value for water arsenic concentrations at 20  $\mu\text{g/L}$  is marked with dotted line.
